# Supplementary material for: Pre- and post- prandial appetite hormone levels in normal weight and severely obese women
Source: Springer Nature journal article supplement (doi:10.1186/1743-7075-6-32), 2009-01-01
Supplement: Additional file 2 [file 1743-7075-6-32-s2.pdf]

Additional file 2. Clinic Protocol

| Procedure                                                                                       | Time                                   |
|-------------------------------------------------------------------------------------------------|----------------------------------------|
| Starting time of study                                                                          | 7:30 am                                |
| Consent form                                                                                    | 7:30 am                                |
| Height, weight, waist & hip circumferences,<br>3 sitting blood pressures & heart rates measured | 7:45 am                                |
| Physician Admit                                                                                 | Before 8:00 am                         |
| 5 min of rest for supine blood pressure and BIA                                                 | 8:00 am                                |
| Insert cannula in back of hand/wrist and baseline blood draw                                    | 8:10 am                                |
| Meal                                                                                            | 8:15-8:30 am                           |
| Blood drawn at 15, 30, 60, 90, and 120 min following the meal                                   | 8:45, 9:00, 9:30<br>10:00 and 10:30 am |
| Review questionnaires and exit interview prior to final blood draw                              | Leave at 10:30 am                      |
| <b>Total time</b>                                                                               | <b>180 min (3 h)</b>                   |
