# Supplementary material for: Pre- and post- prandial appetite hormone levels in normal weight and severely obese women
Source: Springer Nature journal article supplement (doi:10.1186/1743-7075-6-32), 2009-01-01
Supplement: Additional file 3 [file 1743-7075-6-32-s3.pdf]

Additional file 3. Physical Characteristics of the Study Population (mean  $\pm$  SD)

| Parameter                   | Normal Weight Women<br>n=10 | Severely Obese Women<br>n=13 |
|-----------------------------|-----------------------------|------------------------------|
| Age (y)                     | 32.2 $\pm$ 8.6              | 35.6 $\pm$ 9.7               |
| Weight (kg)                 | 62.9 $\pm$ 4.6              | 124.0 $\pm$ 21.5 *           |
| Height (cm)                 | 164.8 $\pm$ 6.52            | 166.7 $\pm$ 4.0              |
| BMI (kg/m <sup>2</sup> )    | 23.1 $\pm$ 1.3              | 44.5 $\pm$ 7.1 *             |
| Waist Circumference (cm)    | 74.8 $\pm$ 4.8              | 130.7 $\pm$ 17.8 *           |
| Hip Circumference (cm)      | 99.7 $\pm$ 5.0              | 141.2 $\pm$ 15.5 *           |
| % Body Fat                  | 30.6 $\pm$ 3.4              | 56.6 $\pm$ 6.0 *             |
| Sitting Systolic BP (mmHg)  | 109.5 $\pm$ 11.0            | 127.0 $\pm$ 16.9             |
| Sitting Diastolic BP (mmHg) | 69.2 $\pm$ 7.6              | 67.9 $\pm$ 10.3              |
| Supine Systolic BP (mmHg)   | 106.1 $\pm$ 8.6             | 123.8 $\pm$ 15.4             |
| Supine Diastolic BP (mmHg)  | 64.9 $\pm$ 6.7              | 64.3 $\pm$ 8.9               |

\* significantly different between groups  $p \leq 0.05$
